# Supplementary material
Source: PubMed Central journal article supplement (PMC5812348)
Supplement: NIHMS937240-supplement-Supplemental_Table_1.pdf [file NIHMS937240-supplement-Supplemental_Table_1.pdf]

Supplemental Table 1. Racial distribution of variants only found in cases.

| Position  | Mutation | Race             |
|-----------|----------|------------------|
| 178936392 | F258Y    | White            |
|           |          | White            |
| 178936294 | G291R    | White            |
| 178682596 | R545X    | African American |
| 178681590 | K568R    | White            |
| 178540212 | V820M    | White            |
|           |          | White            |
|           |          | White            |
|           |          |                  |
| 178633969 |          | White            |
| 178565791 |          | Asian            |
| 178534148 |          | White            |
|           |          | White            |
| 178634135 |          | Asian            |
|           |          | Asian            |
|           |          | African American |
|           |          | White            |
|           |          | White            |
