# Supplementary material
Source: PubMed Central journal article supplement (PMC5812348)
Supplement: NIHMS937240-supplement-Supplemental_Table_2.pdf [file NIHMS937240-supplement-Supplemental_Table_2.pdf]

Supplemental Table 2. Rare intronic variants only found in cases.

| Chr | Position  | Variant      | rs #        | Amino Acid Change | Horvath, n=88, n (MAF) | Validation Set, N=252 | p-value | Total Affected, n=339, n (MAF) | p-value |
|-----|-----------|--------------|-------------|-------------------|------------------------|-----------------------|---------|--------------------------------|---------|
| 2   | 178634135 | c.1738-34G>T | rs115616942 | Intronic          | 0                      | 5 (0.01)              | 0.01    | 5 (0.007)                      | 0.03    |
| 2   | 178633969 | c.1788+82G>A | rs16865776  | Intronic          | 0                      | 1 (0.002)             | 0.42    | 1 (0.001)                      | 0.49    |
| 2   | 178565791 | c.2244+58C>T | rs117712357 | Intronic          | 0                      | 1 (0.002)             | 0.42    | 1 (0.001)                      | 0.49    |
| 2   | 178534148 | c.2562+73G>A | N/A         | Intronic          | 1 (0.006)              | 1 (0.002)             | 0.42    | 2 (0.003)                      | 0.24    |
