# Supplementary material
Source: PubMed Central journal article supplement (PMC5812348)
Supplement: NIHMS937240-supplement-Supplemental_Table_3.pdf [file NIHMS937240-supplement-Supplemental_Table_3.pdf]

Supplemental Table 3. *PDE11A* coding variants identified as non-significantly associated with testicular germ cell tumors

| Chr | Position  | Variant   | rs #        | Amino Acid Change | CADDscore | Total Affected, n=217<br>n (MAF)<br>p-value | Unaffected, n=335<br>n (MAF) | Familial Affected, n=101<br>n (MAF)<br>p-value | Sporadic Affected, n=72<br>n (MAF)<br>p-value | Bilateral Affected, n=44<br>n (MAF)<br>p-value |
|-----|-----------|-----------|-------------|-------------------|-----------|---------------------------------------------|------------------------------|------------------------------------------------|-----------------------------------------------|------------------------------------------------|
| 2   | 178937010 | c.155G>C  | rs77972073  | p.R52T*           | 7.15      | 1 (0.002)<br>1.0                            | 1 (0.001)                    | 0<br>1.0                                       | 1 (0.007)<br>0.32                             | 0<br>1.0                                       |
| 2   | 178936614 | c.551G>A  | rs6433711   | p.R184Q           | 8.87      | 0<br>1.0                                    | 1 (0.001)                    | 0<br>1.0                                       | 0<br>1.0                                      | 0<br>1.0                                       |
| 2   | 178936330 | c.835C>G  | N/A         | p.Q279E           | 20.7      | 0<br>1.0                                    | 1 (0.001)                    | 0<br>1.0                                       | 0<br>1.0                                      | 0<br>1.0                                       |
| 2   | 178936272 | c.893A>G  | rs78328794  | p.N298S           | 21.4      | 1 (0.002)<br>1.0                            | <b>2 (0.001)</b>             | 1 (0.005)<br>0.41                              | 0<br>1.0                                      | 0<br>1.0                                       |
| 2   | 178879055 | c.1045G>A | rs77477862  | p.A349T*          | 12.87     | 1 (0.002)<br>1.0                            | 2 (0.003)                    | 1 (0.005)<br>0.55                              | 0<br>1.0                                      | 0<br>1.0                                       |
| 2   | 178879181 | c.919C>T  | rs76308115  | p.R307X*          | 34        | 2 (0.005)<br>0.71                           | 5 (0.007)                    | 1 (0.005)<br>1.0                               | 0<br>0.59                                     | 1 (0.011)<br>0.52                              |
| 2   | 178681638 | c.1655T>C | rs138427178 | p.I552T           | 19.5      | 0<br>0.52                                   | 2 (0.003)                    | 0<br>1.0                                       | 0<br>1.0                                      | 0<br>1.0                                       |
| 2   | 178681585 | c.1708T>C | rs149795546 | p.S570P           | 21.4      | 1 (0.002)<br>1.0                            | 1 (0.001)                    | 1 (0.005)<br>0.41                              | 0<br>1.0                                      | 0<br>1.0                                       |
| 2   | 178592864 | c.1825G>A | rs77934668  | p.D609N*          | 13.98     | 1 (0.002)<br>1.0                            | 1 (0.001)                    | 0<br>1.0                                       | 1 (0.007)<br>0.32                             | 0<br>1.0                                       |
| 2   | 178592758 | c.1931A>G | N/A         | p.Y644C           | 20.2      | 0<br>1.0                                    | 1 (0.001)                    | 0<br>1.0                                       | 0<br>1.0                                      | 0<br>1.0                                       |
| 2   | 178565913 | c.2180A>G | rs17400325  | p.Y727C*          | 21.6      | 24 (0.055)<br>0.13                          | 24 (0.036)                   | 10 (0.050)<br>0.41                             | 9 (0.063)<br>0.16                             | 5 (0.057)<br>0.37                              |
| 2   | 178545566 | c.2411G>T | rs75127279  | p.R804H*          | 23.6      | 7 (0.016)<br>0.82                           | 13 (0.019)                   | 4 (0.020)<br>1.0                               | 1 (0.007)<br>0.48                             | 2 (0.023)<br>0.69                              |
| 2   | 178528641 | c.2599C>G | rs61306957  | p.R867G*          | 10.44     | 7 (0.016)<br>1.0                            | 12 (0.018)                   | 4 (0.020)<br>0.77                              | 1 (0.007)<br>0.48                             | 2 (0.023)<br>0.67                              |
| 2   | 178528608 | c.2632A>G | rs74357545  | p.M878V*          | 12.34     | 4 (0.009)<br>0.43                           | 11 (0.016)                   | 1 (0.005)<br>0.31                              | 2 (0.014)<br>1.0                              | 1 (0.011)<br>1.0                               |

Previously reported in Horvath et al. (Horvath et al. 2009); MAF: Minor allele frequency; CADD = Combined Annotation-Dependent Depletion score (Kircher et al. 2014).N/A: not available
